# Supplementary material for: Clinical manifestations of Rift Valley fever in humans: Systematic review and meta-analysis
Source: PubMed Central journal article supplement (PMC8986116; doi:10.1371/journal.pntd.0010233), 2022-03-25
Supplement: pntd.0010233.s005.pdf [file pntd.0010233.s005.pdf]

55 Fig. Forest plots for the common symptoms under the hepatic syndrome

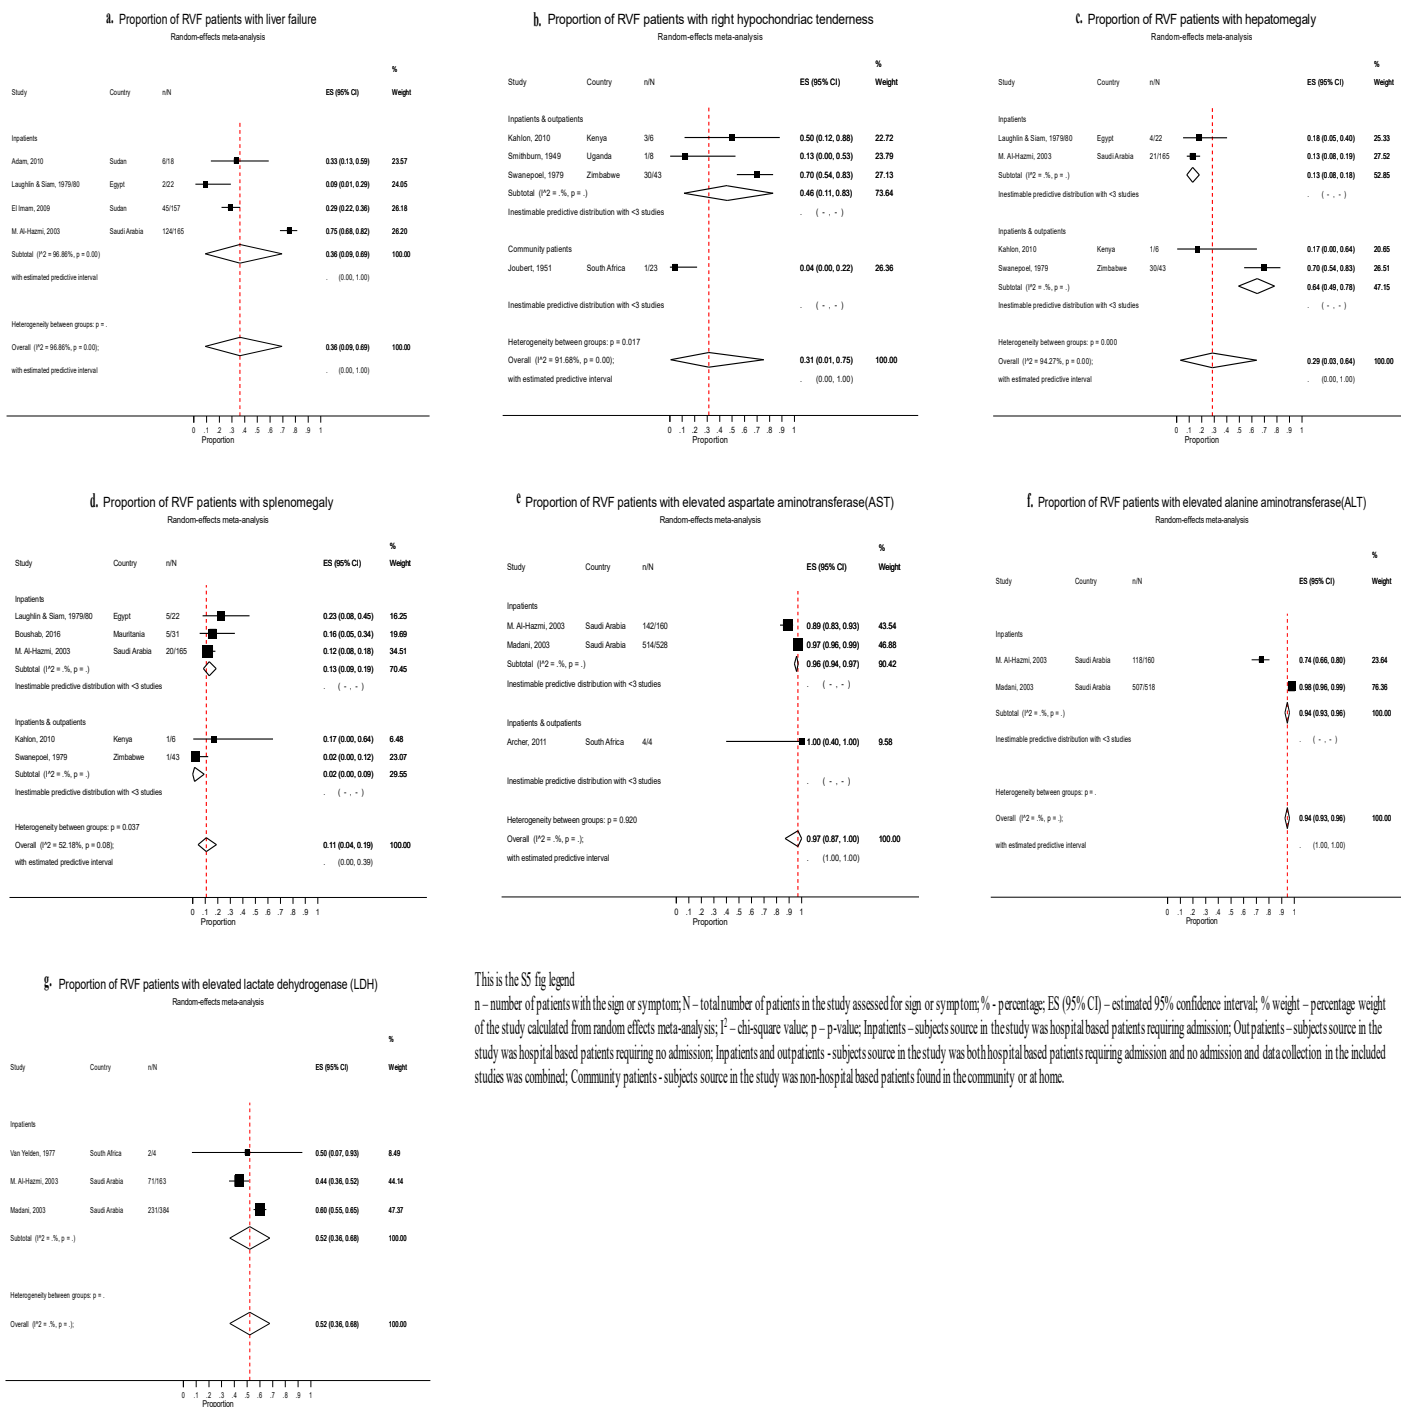

This is the 55 fig legend

n – number of patients with the sign or symptom; N – total number of patients in the study assessed for sign or symptom; % – percentage; ES (95% CI) – estimated 95% confidence interval; % weight – percentage weight of the study calculated from random effects meta-analysis;  $I^2$  – chi-square value;  $p$  –  $p$ -value; Inpatients – subjects source in the study was hospital based patients requiring admission; Outpatients – subjects source in the study was hospital based patients requiring no admission; Inpatients and outpatients – subjects source in the study was both hospital based patients requiring admission and no admission and data collection in the included studies was combined; Community patients – subjects source in the study was non-hospital based patients found in the community or at home.
