# Supplementary material for: Clinical manifestations of Rift Valley fever in humans: Systematic review and meta-analysis
Source: PubMed Central journal article supplement (PMC8986116; doi:10.1371/journal.pntd.0010233), 2022-03-25
Supplement: pntd.0010233.s007.pdf [file pntd.0010233.s007.pdf]

# S7 Fig. Forest plots for the common symptoms under the neurological syndrome

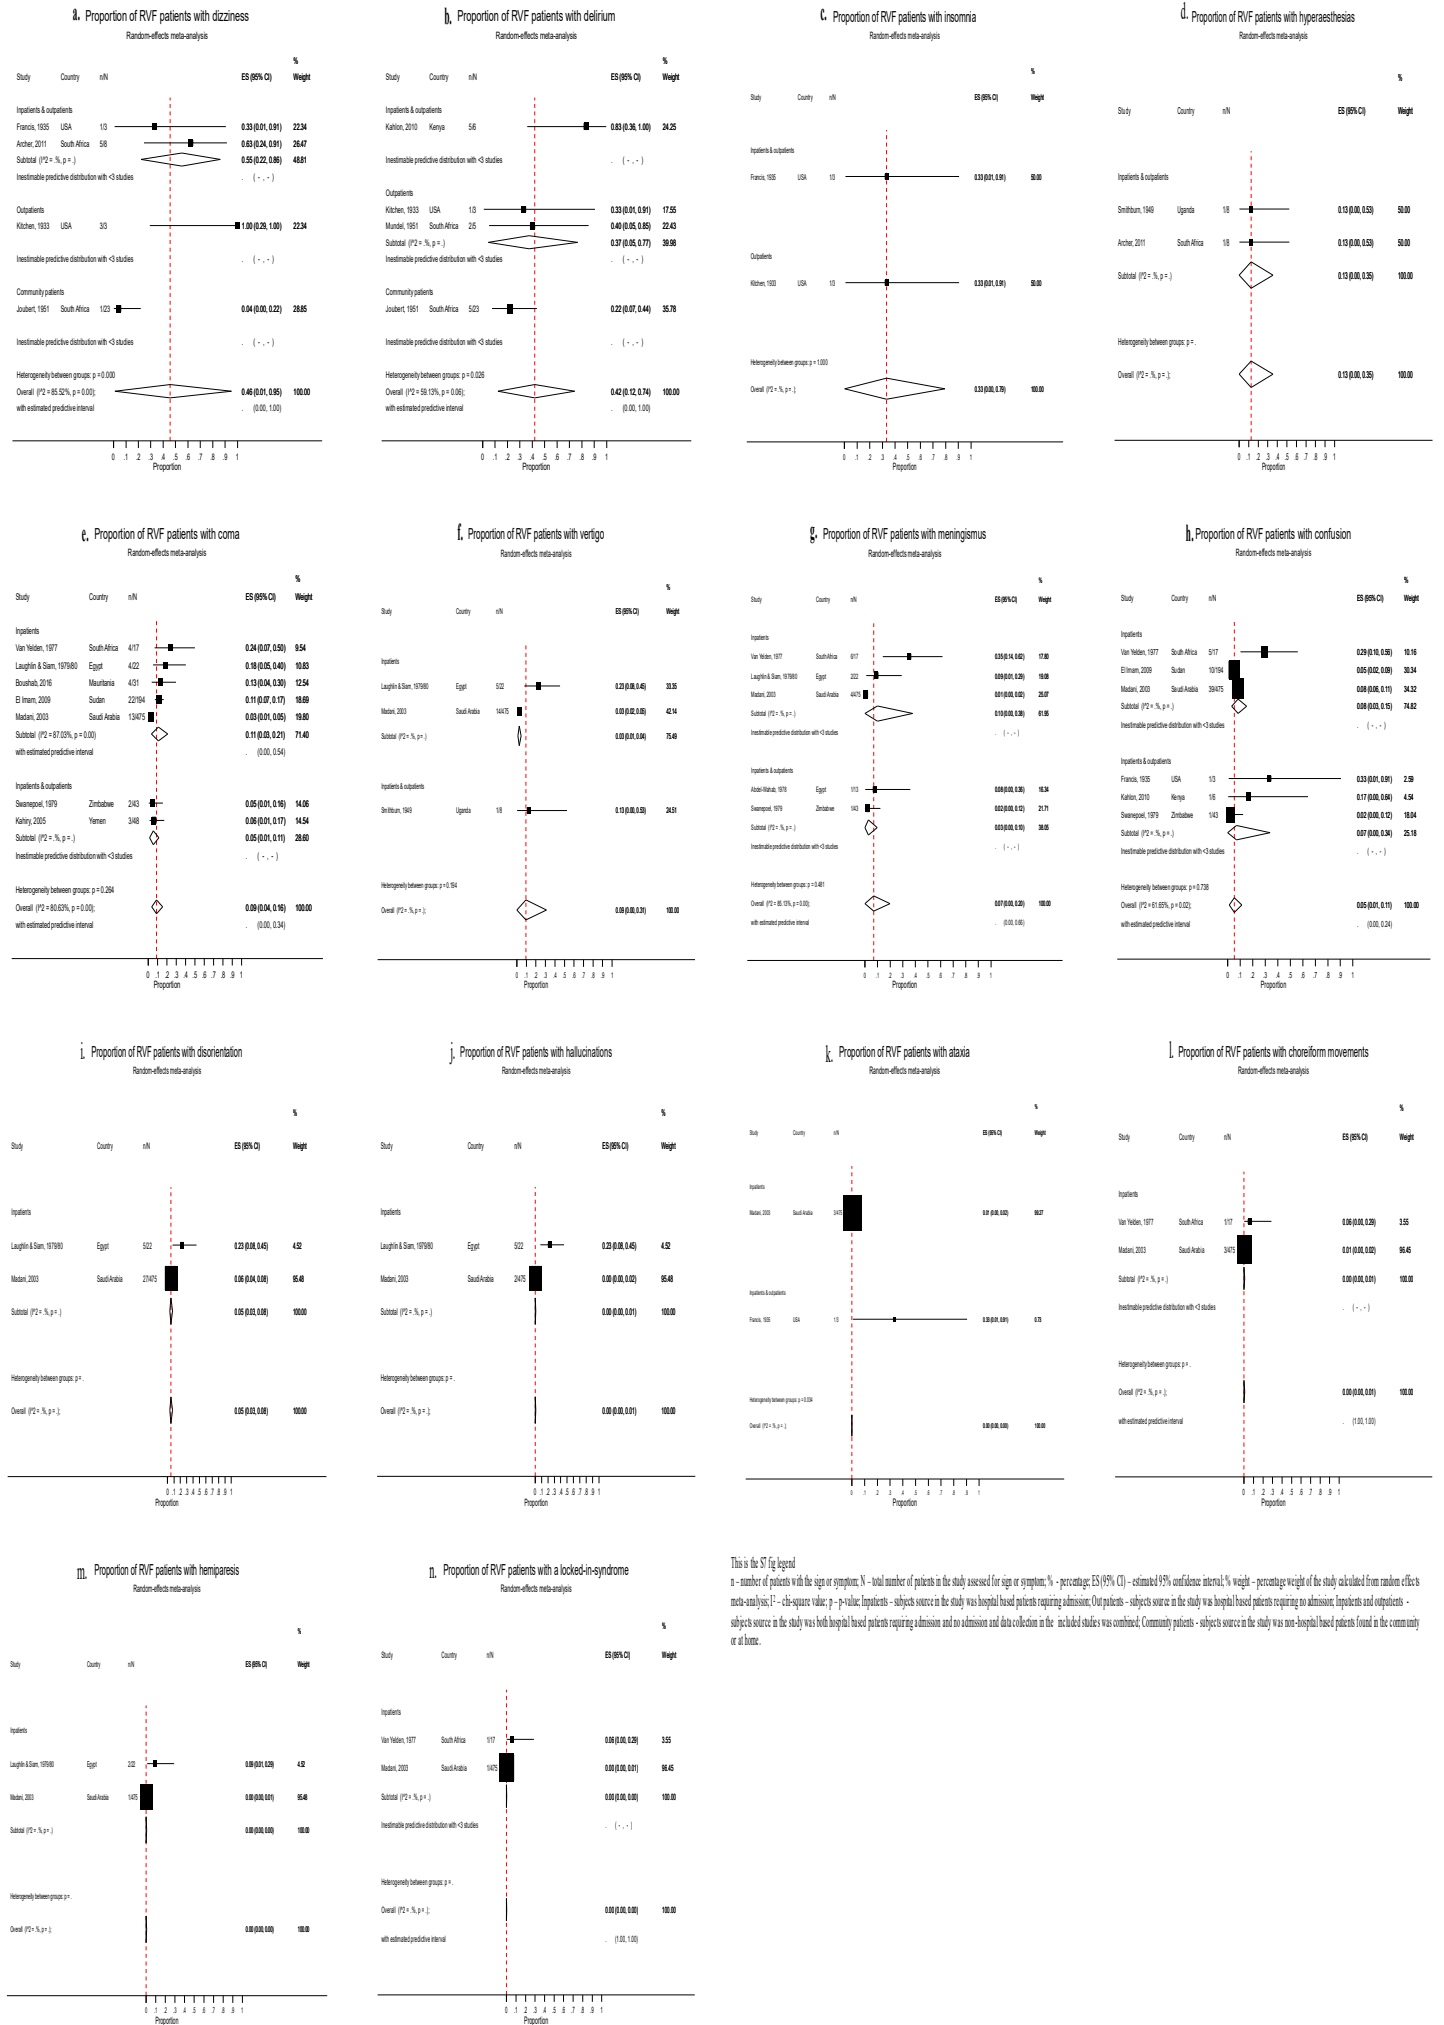

This is the S7 fig legend  
n - number of patients with the sign or symptom; N - total number of patients in the study assessed for sign or symptom; % - percentage; ES (95% CI) - estimated 95% confidence interval; % weight - percentage weight of the study calculated from random effects meta-analysis; I<sup>2</sup> - chi-square value; p - p-value; Inpatients - subjects source in the study was hospital based patients requiring admission; Outpatients - subjects source in the study was hospital based patients requiring no admission; Inpatients and outpatients - subjects source in the study was both hospital based patients requiring admission and no admission and data collection in the included studies was combined; Community patients - subjects source in the study was non-hospital based patients found in the community or at home.
