# Supplementary material for: Clinical manifestations of Rift Valley fever in humans: Systematic review and meta-analysis
Source: PubMed Central journal article supplement (PMC8986116; doi:10.1371/journal.pntd.0010233), 2022-03-25
Supplement: pntd.0010233.s008.pdf [file pntd.0010233.s008.pdf]

S8 Fig. Forest plots for the common symptoms under the haemorrhagic syndrome

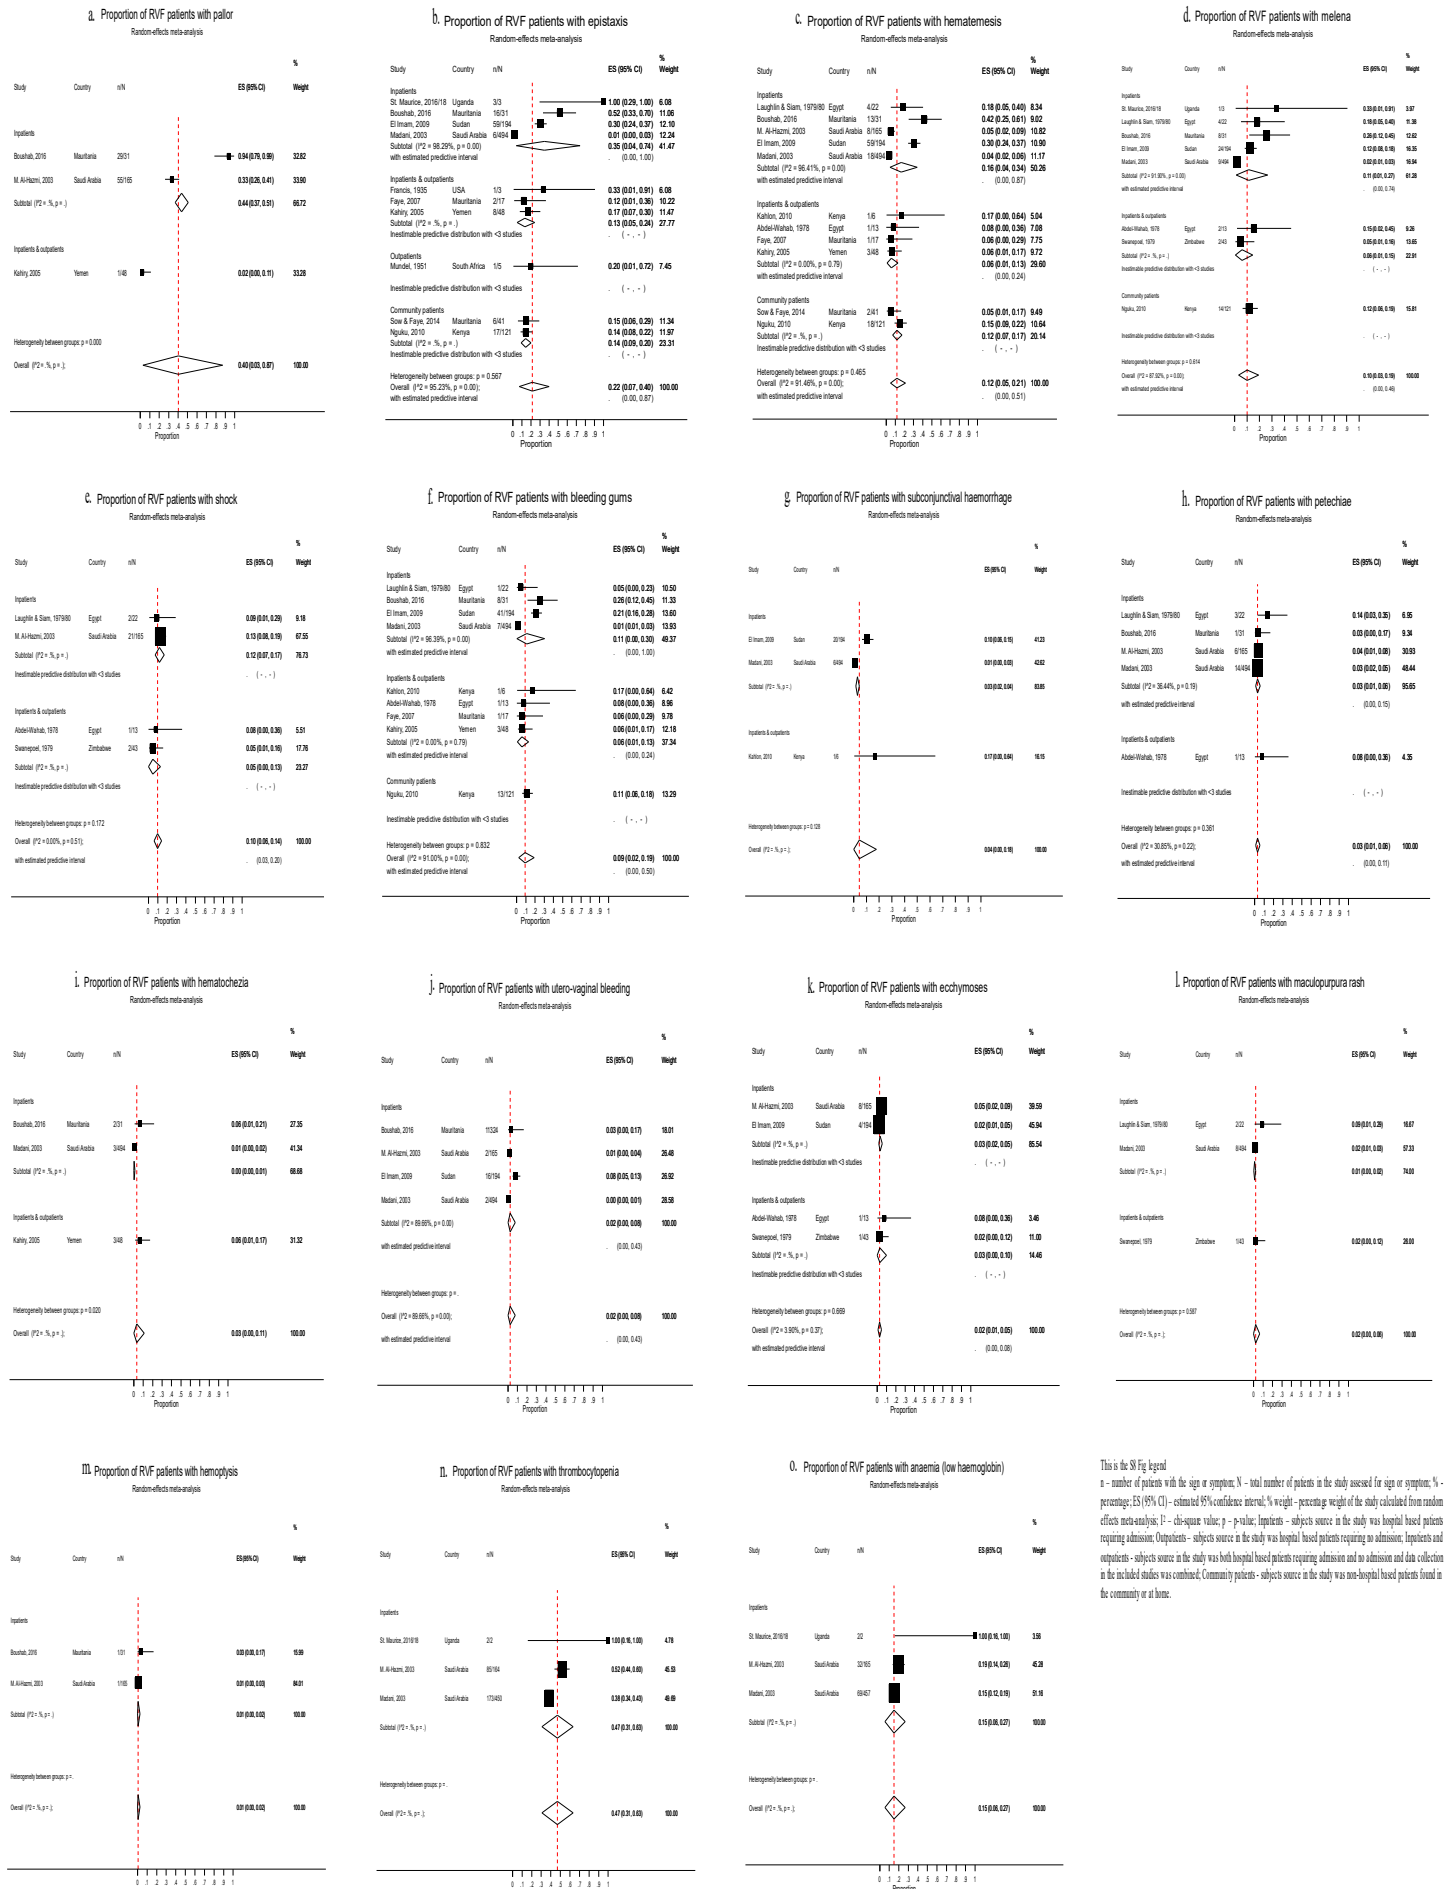

This is the S8 Fig legend  
 n = number of patients with the sign or symptom; N = total number of patients in the study assessed for sign or symptom; % = percentage; ES (95% CI) = estimated 95% confidence interval; % weight = percentage weight of the study calculated from random effects meta-analysis; I<sup>2</sup> = chi-square value; p = p-value; Inpatients – subjects source in the study was hospital based; Patients requiring admission: Outpatients – subjects source in the study was hospital based patients requiring no admission; Inpatients and outpatients – subjects source in the study was both hospital based patients requiring admission and no admission and data collection in the included studies was combined; Community patients – subjects source in the study was non-hospital based patients found in the community or at home.
